# Supplementary material for: How Does Regulation Impact Strategic Repositioning by Firms Across Submarkets? Evidence from the Indian Pharmaceutical Industry
Source: Atypon-hosted journal article supplement (doi:10.1287/stsc.2020.0121), 2021-02-09
Supplement: stsc.2020.0121.sm1.pdf [file stsc.2020.0121.sm1.pdf]

## ONLINE APPENDIX

Figure A1. The evolution of various percentiles of prices normalized per 500mg over time for regulated and unregulated dosages of acetaminophen tablets

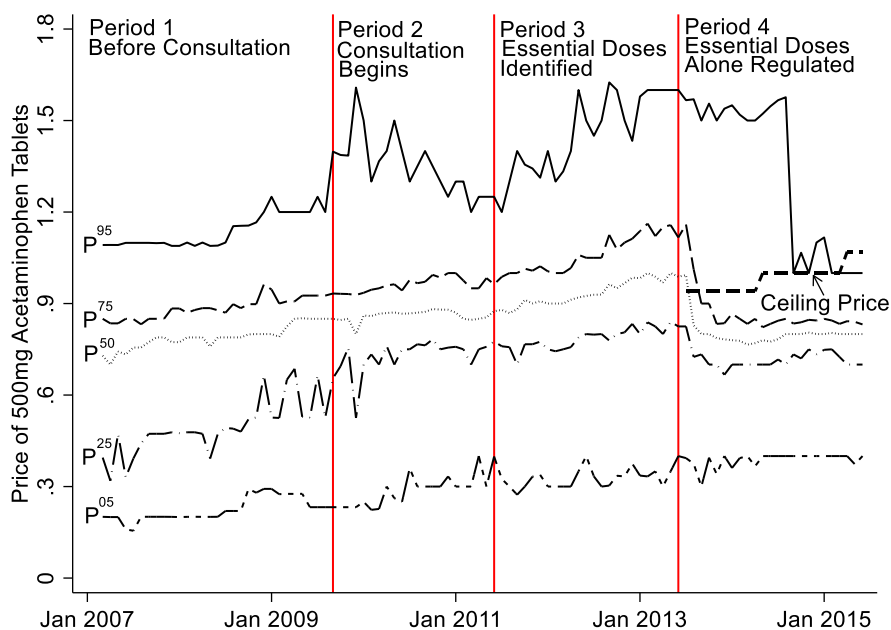

Figure A2. Total number of prescriptions, in millions of tablets, over time for acetaminophen tablets for unregulated 500mg and regulated 650mg dosage formulations

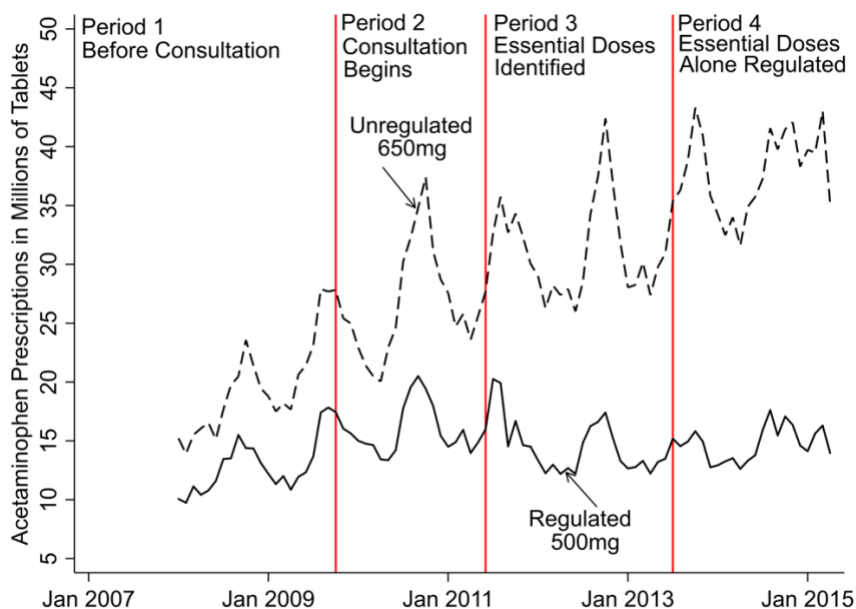

Figure A2 Notes. The total number of prescriptions in millions of tablets for both regulated and unregulated dosage formulations of acetaminophen tablets are plotted. The number of prescriptions for the regulated 500mg acetaminophen tablets was lower, relative to that for the 650mg acetaminophen tablets, in period 3 and period 4. The source of prescription data is IMS Health Medical Audit.

Table A1. Robustness check for the subsamples of firms with below and above median marketing intensity

| Columns                                           | (1)                               | (2)                          | (3)                | (4)                          | (3)                          | (4)                |
|---------------------------------------------------|-----------------------------------|------------------------------|--------------------|------------------------------|------------------------------|--------------------|
| Sample                                            | CMIE Sample                       |                              |                    | CMIE Diversified Firms       |                              |                    |
| Subsample                                         | < Median Marketing Intensity      | > Median Marketing Intensity | Both Combined      | < Median Marketing Intensity | > Median Marketing Intensity | Both Combined      |
| D.V.                                              | Fraction of 500mg Sales by Volume |                              |                    |                              |                              |                    |
| Period 2                                          | -0.04***<br>[0.01]                | -0.05***<br>[0.02]           | -0.04***<br>[0.01] | -0.06***<br>[0.02]           | -0.05***<br>[0.01]           | -0.06***<br>[0.02] |
| Period 3                                          | -0.09***<br>[0.02]                | -0.14***<br>[0.02]           | -0.08***<br>[0.01] | -0.08***<br>[0.02]           | -0.11***<br>[0.02]           | -0.08***<br>[0.02] |
| Period 4                                          | -0.06***<br>[0.01]                | -0.17***<br>[0.03]           | -0.07***<br>[0.01] | -0.08***<br>[0.02]           | -0.13***<br>[0.02]           | -0.09***<br>[0.02] |
| Period 2 x Above Median Marketing Intensity Dummy |                                   |                              | -0.03<br>[0.02]    |                              |                              | -0.01<br>[0.02]    |
| Period 3 x Above Median Marketing Intensity Dummy |                                   |                              | -0.04*<br>[0.02]   |                              |                              | -0.03<br>[0.03]    |
| Period 4 x Above Median Marketing Intensity Dummy |                                   |                              | -0.10***<br>[0.03] |                              |                              | -0.05*<br>[0.03]   |
| Above Median Marketing Intensity Dummy            |                                   |                              | 0.05**<br>[0.02]   |                              |                              | 0.02<br>[0.02]     |
| HHI                                               | -0.05<br>[0.05]                   | -0.01<br>[0.06]              | -0.03<br>[0.04]    | -0.05<br>[0.07]              | 0.06<br>[0.05]               | 0.02<br>[0.04]     |
| Constant                                          | 0.37***<br>[0.03]                 | 0.54***<br>[0.05]            | 0.43***<br>[0.04]  | 0.37***<br>[0.02]            | 0.62***<br>[0.03]            | 0.50***<br>[0.03]  |
| Firm Fixed Effects                                | Yes                               | Yes                          | Yes                | Yes                          | Yes                          | Yes                |
| Region Fixed Effects                              | Yes                               | Yes                          | Yes                | Yes                          | Yes                          | Yes                |
| Month Fixed Effects                               | Yes                               | Yes                          | Yes                | Yes                          | Yes                          | Yes                |
| Observations                                      | 11,112                            | 11,958                       | 21,718             | 5,232                        | 6,784                        | 11,413             |
| R-squared                                         | 0.820                             | 0.661                        | 0.750              | 0.775                        | 0.679                        | 0.745              |

Table A1 Notes: As the interaction terms can capture both within and between effects (Shaver, 2019), while hypothesis 3 relates to between effects, we have run a segmented regression in this table. Here, we split the marketing intensity variable based on the median value. The results show that the period dummies are lower for the sample of firms with above median marketing intensity, confirming that cross-sectional variation explains a significant part of the marketing intensity effect. Standard errors clustered at the firm-region level are reported in parentheses, \*\*\* p<0.01, \*\* p<0.05, \* p<0.1

Table A2. Robustness check: OLS Estimates for the price per 500mg of acetaminophen tablets before and after regulation

| Columns                               | (1)                | (2)                | (3)                    | (4)                |
|---------------------------------------|--------------------|--------------------|------------------------|--------------------|
| Sample                                | Full Sample        |                    | Diversified Firms Only |                    |
| D.V.                                  | Price per 500mg    |                    |                        |                    |
| Period 2                              | 0.08***<br>[0.01]  | 0.08***<br>[0.01]  | 0.07***<br>[0.01]      | 0.08***<br>[0.01]  |
| Period 3                              | 0.13***<br>[0.01]  | 0.13***<br>[0.01]  | 0.13***<br>[0.01]      | 0.13***<br>[0.01]  |
| Period 4                              | 0.01<br>[0.01]     | 0.01<br>[0.01]     | -0.01<br>[0.01]        | -0.00<br>[0.01]    |
| Period 2 x Unregulated                | -0.02<br>[0.01]    | -0.03*<br>[0.01]   | 0.01<br>[0.01]         | -0.00<br>[0.01]    |
| Period 3 x Unregulated                | 0.01<br>[0.02]     | 0.02<br>[0.02]     | 0.03*<br>[0.02]        | 0.04*<br>[0.02]    |
| Period 4 x Unregulated                | 0.22***<br>[0.02]  | 0.21***<br>[0.02]  | 0.25***<br>[0.02]      | 0.24***<br>[0.02]  |
| Period 2 x Slow Release               | -0.09***<br>[0.02] | -0.16***<br>[0.03] | -0.06***<br>[0.02]     | -0.13***<br>[0.02] |
| Period 3 x Slow Release               | -0.10***<br>[0.02] | -0.62***<br>[0.04] | -0.02<br>[0.03]        | -0.56***<br>[0.04] |
| Period 4 x Slow Release               | -0.11***<br>[0.03] | -0.56***<br>[0.04] | 0.04<br>[0.03]         | -0.49***<br>[0.04] |
| Period 2 x Pack=15                    | -0.00<br>[0.01]    | -0.03**<br>[0.01]  | 0.01<br>[0.01]         | -0.01<br>[0.01]    |
| Period 3 x Pack=15                    | 0.11***<br>[0.02]  | 0.12***<br>[0.02]  | 0.11***<br>[0.02]      | 0.12***<br>[0.02]  |
| Period 4 x Pack=15                    | 0.07***<br>[0.02]  | 0.06***<br>[0.02]  | 0.08***<br>[0.02]      | 0.07***<br>[0.02]  |
| Period 2 x Unregulated x Slow Release |                    | 0.08**<br>[0.04]   |                        | 0.08**<br>[0.03]   |
| Period 3 x Unregulated x Slow Release |                    | 0.52***<br>[0.04]  |                        | 0.55***<br>[0.04]  |
| Period 4 x Unregulated x Slow Release |                    | 0.45***<br>[0.04]  |                        | 0.53***<br>[0.05]  |
| Period 2 x Unregulated x Pack=15      |                    | 0.14***<br>[0.02]  |                        | 0.13***<br>[0.02]  |
| Period 3 x Unregulated x Pack=15      |                    | -0.04<br>[0.03]    |                        | -0.04<br>[0.03]    |
| Period 4 x Unregulated x Pack=15      |                    | 0.03<br>[0.03]     |                        | 0.02<br>[0.03]     |
| Unregulated                           | 0.06***<br>[0.01]  | 0.06***<br>[0.01]  | 0.05***<br>[0.01]      | 0.05***<br>[0.01]  |
| Slow Release                          | 0.33***<br>[0.02]  | 0.33***<br>[0.02]  | 0.26***<br>[0.01]      | 0.26***<br>[0.01]  |
| Pack=15                               | 0.06**<br>[0.02]   | 0.06**<br>[0.02]   | 0.05**<br>[0.03]       | 0.05**<br>[0.02]   |
| HHI                                   | -0.08***<br>[0.03] | -0.08***<br>[0.03] | -0.07**<br>[0.03]      | -0.07**<br>[0.03]  |
| Constant                              | 0.87***<br>[0.04]  | 0.87***<br>[0.04]  | 0.80***<br>[0.02]      | 0.80***<br>[0.02]  |
| Firm Fixed Effects                    | Yes                | Yes                | Yes                    | Yes                |

|                      |        |        |        |        |
|----------------------|--------|--------|--------|--------|
| Region Fixed Effects | Yes    | Yes    | Yes    | Yes    |
| Month Fixed Effects  | Yes    | Yes    | Yes    | Yes    |
| Observations         | 93,436 | 93,436 | 75,473 | 75,473 |
| R-squared            | 0.493  | 0.494  | 0.302  | 0.303  |

---

Table A2 Notes: Standard errors clustered at the firm-region level are reported in parentheses; \*\*\* p<0.01, \*\* p<0.05, \* p<0.1

Table A3. Repositioning by specialist firms in subsamples of 650mg and 500mg submarkets

| Columns                        | (1)                    | (2)                | (3)                | (4)                    | (5)             | (6)               |
|--------------------------------|------------------------|--------------------|--------------------|------------------------|-----------------|-------------------|
| Sample                         | All                    | CMIE               | All                | All                    | CMIE            | All               |
| Subsample                      | Specialist 500mg Firms |                    |                    | Specialist 650mg Firms |                 |                   |
| D.V.                           | Sales Volume           |                    |                    |                        |                 |                   |
| Period 2                       | 0.05<br>[0.05]         | 0.28*<br>[0.16]    | 0.13***<br>[0.05]  | 0.11**<br>[0.04]       | 0.18<br>[0.12]  | 0.06**<br>[0.03]  |
| Period 3                       | 0.10**<br>[0.05]       | 0.35*<br>[0.19]    | 0.17***<br>[0.05]  | 0.23**<br>[0.09]       | 0.36*<br>[0.22] | 0.14**<br>[0.06]  |
| Period 4                       | 0.06<br>[0.06]         | 0.36**<br>[0.16]   | 0.14**<br>[0.06]   | 0.34**<br>[0.15]       | 0.65*<br>[0.35] | 0.21**<br>[0.09]  |
| Period 2 x Marketing Intensity |                        | -5.66*<br>[3.33]   |                    |                        | -0.14<br>[1.55] |                   |
| Period 3 x Marketing Intensity |                        | -5.94**<br>[3.01]  |                    |                        | -0.88<br>[2.26] |                   |
| Period 4 x Marketing Intensity |                        | -7.05***<br>[2.62] |                    |                        | -2.47<br>[3.03] |                   |
| Period 2 x Marketing Proxy     |                        |                    | -0.36**<br>[0.14]  |                        |                 | 0.49**<br>[0.24]  |
| Period 3 x Marketing Proxy     |                        |                    | -0.28**<br>[0.11]  |                        |                 | 0.71**<br>[0.33]  |
| Period 4 x Marketing Proxy     |                        |                    | -0.35***<br>[0.13] |                        |                 | 0.84**<br>[0.40]  |
| Marketing Intensity            |                        | 3.36<br>[2.60]     |                    |                        | -1.82<br>[1.37] |                   |
| Marketing Proxy                |                        |                    | 0.38**<br>[0.17]   |                        |                 | -1.25**<br>[0.56] |
| HHI                            | -0.18<br>[0.19]        | -0.19<br>[0.23]    | -0.18<br>[0.18]    | 0.11<br>[0.19]         | 0.08<br>[0.34]  | 0.07<br>[0.18]    |
| Constant                       | 1.98***<br>[0.22]      | 0.08<br>[0.14]     | 1.86***<br>[0.21]  | -0.20<br>[0.18]        | 0.20<br>[0.18]  | -0.02<br>[0.15]   |
| Observations                   | 12,569                 | 3,941              | 12,569             | 12,380                 | 6,116           | 12,380            |
| R-squared                      | 0.199                  | 0.293              | 0.205              | 0.457                  | 0.479           | 0.468             |
| Firm Fixed Effects             | Yes                    | Yes                | Yes                | Yes                    | Yes             | Yes               |
| Region Fixed Effects           | Yes                    | Yes                | Yes                | Yes                    | Yes             | Yes               |
| Month Fixed Effects            | Yes                    | Yes                | Yes                | Yes                    | Yes             | Yes               |

Table A3 Notes. Columns 1 to 3 use subsamples of specialist 500mg firms and 4 to 6 use subsamples of specialist 650mg firms. The results using both marketing intensity and J1 prescriptions-based marketing proxy are reported. Standard errors clustered at the firm-region level are reported in parentheses; \*\*\* p<0.01, \*\* p<0.05, \* p<0.1

Table A4. Results for GSK subsample

| Column                 | (1)                                   | (2)                |
|------------------------|---------------------------------------|--------------------|
| D.V.                   | Fraction of 500mg<br>Sales by Revenue | Price per 500mg    |
| Period 2               | -0.03*<br>[0.02]                      | 0.12***<br>[0.01]  |
| Period 3               | -0.07***<br>[0.02]                    | 0.36***<br>[0.02]  |
| Period 4               | -0.13***<br>[0.02]                    | 0.23***<br>[0.02]  |
| Period 2 x Unregulated |                                       | -0.06***<br>[0.01] |
| Period 3 x Unregulated |                                       | -0.24***<br>[0.02] |
| Period 4 x Unregulated |                                       | -0.03<br>[0.02]    |
| Unregulated            |                                       | 0.17***<br>[0.01]  |
| HHI                    | 0.33***<br>[0.10]                     | -0.05<br>[0.06]    |
| Constant               | 0.76***<br>[0.03]                     | 0.77***<br>[0.02]  |
| Firm Fixed Effects     | Yes                                   | Yes                |
| Region Fixed Effects   | Yes                                   | Yes                |
| Month Fixed Effects    | Yes                                   | Yes                |
| Observations           | 2,300                                 | 9,335              |
| R-squared              | 0.557                                 | 0.221              |

Table A4 Notes: Standard errors clustered at the firm-region level are reported in parentheses, \*\*\* p<0.01, \*\* p<0.05, \* p<0.1

Table A5. Results for subsample excluding GSK

| Columns                                      | (1)                                | (2)                | (3)                | (4)                |
|----------------------------------------------|------------------------------------|--------------------|--------------------|--------------------|
| Sample                                       | All Firms                          | CMIE Sample        | All Firms          | CMIE Sample        |
| D.V.                                         | Fraction of 500mg Sales by Revenue |                    | Price per 500mg    |                    |
| Period 2                                     | 0.00<br>[0.01]                     | -0.05***<br>[0.02] | 0.08***<br>[0.01]  | 0.18***<br>[0.03]  |
| Period 3                                     | -0.04***<br>[0.01]                 | -0.05**<br>[0.02]  | 0.12***<br>[0.01]  | 0.17***<br>[0.04]  |
| Period 4                                     | -0.07***<br>[0.01]                 | 0.01<br>[0.02]     | 0.00<br>[0.01]     | 0.07*<br>[0.04]    |
| Period 2 x Unregulated                       |                                    |                    | -0.02<br>[0.02]    | -0.12***<br>[0.03] |
| Period 3 x Unregulated                       |                                    |                    | 0.03<br>[0.02]     | -0.03<br>[0.03]    |
| Period 4 x Unregulated                       |                                    |                    | 0.23***<br>[0.02]  | 0.12***<br>[0.03]  |
| Period 2 x Marketing Intensity               |                                    | -0.12<br>[0.35]    |                    | -2.09***<br>[0.70] |
| Period 3 x Marketing Intensity               |                                    | -1.58***<br>[0.53] |                    | -1.52*<br>[0.92]   |
| Period 4 x Marketing Intensity               |                                    | -3.35***<br>[0.53] |                    | -2.59***<br>[0.88] |
| Period 2 x Unregulated x Marketing Intensity |                                    |                    |                    | 3.05***<br>[0.48]  |
| Period 2 x Unregulated x Marketing Intensity |                                    |                    |                    | 3.11***<br>[0.80]  |
| Period 2 x Unregulated x Marketing Intensity |                                    |                    |                    | 3.86***<br>[0.58]  |
| Unregulated x Marketing Intensity            |                                    |                    |                    | -3.03***<br>[0.46] |
| Marketing Intensity                          |                                    | 0.93**<br>[0.44]   |                    | 2.42***<br>[0.85]  |
| Unregulated                                  |                                    |                    | 0.04***<br>[0.02]  | 0.16***<br>[0.02]  |
| Slow Release                                 |                                    |                    | 0.25***<br>[0.02]  | 0.31***<br>[0.03]  |
| Pack=15                                      |                                    |                    | -0.06***<br>[0.01] | -0.02<br>[0.03]    |
| HHI                                          | -0.02<br>[0.03]                    | -0.05<br>[0.05]    | -0.08**<br>[0.03]  | -0.19***<br>[0.06] |
| Constant                                     | 0.67***<br>[0.03]                  | 0.38***<br>[0.04]  | 0.96***<br>[0.04]  | 0.67***<br>[0.05]  |
| Firm Fixed Effects                           | Yes                                | Yes                | Yes                | Yes                |
| Region Fixed Effects                         | Yes                                | Yes                | Yes                | Yes                |
| Month Fixed Effects                          | Yes                                | Yes                | Yes                | Yes                |
| Observations                                 | 50,087                             | 19,694             | 84,101             | 34,378             |
| R-squared                                    | 0.733                              | 0.739              | 0.502              | 0.245              |

Table A5 Notes: Standard errors clustered at the firm-region level are reported in parentheses, \*\*\* p<0.01, \*\* p<0.05, \* p<0.1
